# Supplementary material
Source: publisher figshare collection journal article supplement (https://sage.figshare.com/ndownloader/files/13158599)
Supplement: Supplementary file 1 [file 13158599]

Graphic Abstract
